# Supplementary material for: Cu nanoparticles immobilized on montmorillonite by biquaternary ammonium salts: a highly active and stable heterogeneous catalyst for cascade sequence to indole-2-carboxylic esters
Source: Royal Society of Chemistry journal article supplement (doi:10.1039/c6ra25861a), 2017-01-01

|                                                                                      |                |
|--------------------------------------------------------------------------------------|----------------|
| <b>Index</b>                                                                         |                |
| <b>Preparation route of Q .....</b>                                                  | <b>S2</b>      |
| <b>Mass spectrum of Q .....</b>                                                      | <b>S3</b>      |
| <b><sup>1</sup>H NMR Spectrum of Q .....</b>                                         | <b>S4</b>      |
| <b><sup>13</sup>C NMR Spectrum of Q .....</b>                                        | <b>S5</b>      |
| <b>Preparation of Q-MMT and Cu-Q-MMT.....</b>                                        | <b>S6</b>      |
| <b>TEM of the different copper loadings of catalysts and recycled Cu-Q-MMT .....</b> | <b>S7</b>      |
| <b>Effect of base and solvent.....</b>                                               | <b>S8</b>      |
| <b>Effect of reaction temperature and the amount of catalyst .....</b>               | <b>S9</b>      |
| <b>Effect of different Cu loading of the catalyst .....</b>                          | <b>S10</b>     |
| <b>Characterization data of products .....</b>                                       | <b>S11-S27</b> |

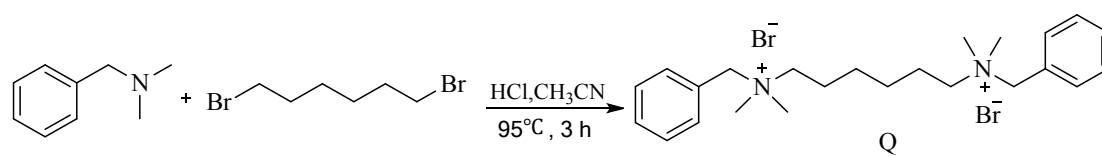

Scheme 1. Preparation route of Q

## Mass Spectrum SmartFormula Report

### Analysis Info

Analysis Name D:\Data\User\_data\zhoulimei\yinmengyun\20160731-2ymy.d  
Method DEFAULT.m  
Sample Name 20160731-2ymy  
Comment

Acquisition Date 7/31/2016 11:50:58 AM

Operator BDAL@CN

Instrument / Ser# microTOF-Q II 10429

### Acquisition Parameter

|             |            |                       |           |                  |           |
|-------------|------------|-----------------------|-----------|------------------|-----------|
| Source Type | ESI        | Ion Polarity          | Positive  | Set Nebulizer    | 0.4 Bar   |
| Focus       | Not active | Set Capillary         | 4500 V    | Set Dry Heater   | 180 °C    |
| Scan Begin  | 50 m/z     | Set End Plate Offset  | -500 V    | Set Dry Gas      | 4.0 l/min |
| Scan End    | 3000 m/z   | Set Collision Cell RF | 650.0 Vpp | Set Divert Valve | Waste     |

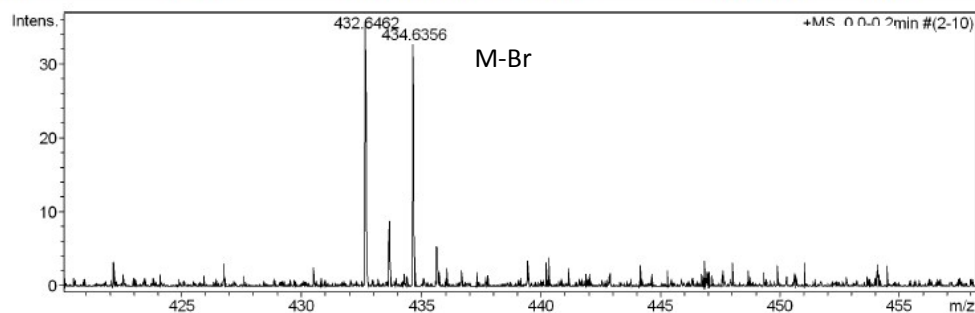

| # | m/z      | Res. | S/N  | I  | FWHM   |
|---|----------|------|------|----|--------|
| 1 | 432.6462 | 8263 | 70.0 | 36 | 0.0524 |
| 2 | 434.6356 | 8817 | 63.9 | 33 | 0.0493 |

Figure 1. Mass spectrum of Q.

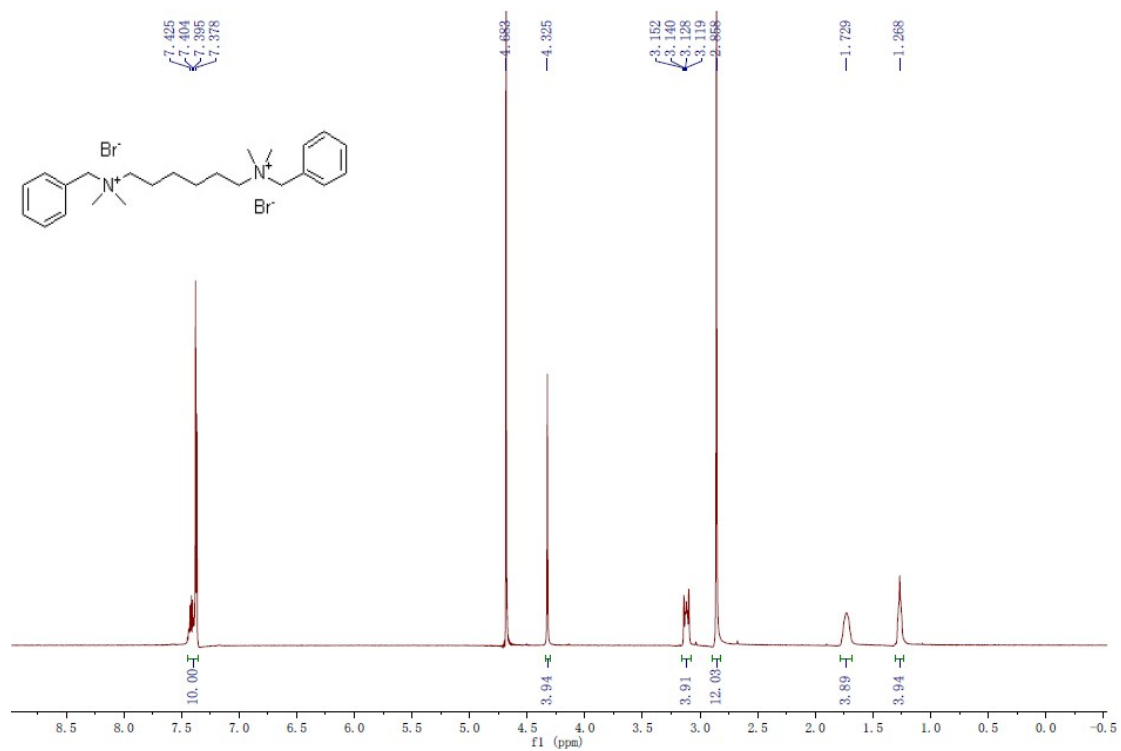

Figure 2.  $^1\text{H}$  NMR Spectrum of Q.

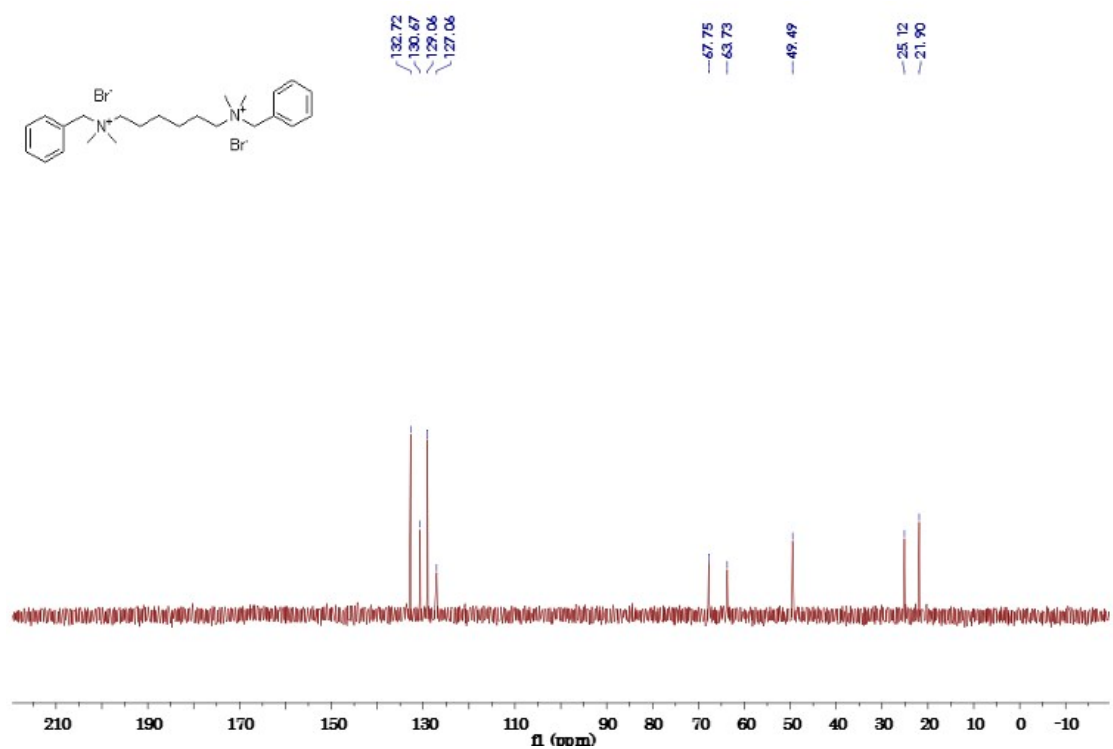

Figure 3.  $^{13}\text{C}$  NMR Spectrum of Q.

### *Preparation of Q-MMT*

Q-MMT and Cu-Q-MMT materials were prepared by a method similar to our previous reported method [7] (Seen in supporting information). Montmorillonite (0.25 g) was dispersed in deionized H<sub>2</sub>O (60 mL) and stirred at 70 °C for 1 h to form a suspension. Aqueous solution of Q (20 mL, 22 mmol/L) was slowly added to the suspension within 2 h. Then the mixture was sonicated at 70 °C for 1 h before equilibrated 1(2 h at room temperature. The system was filtered and the filter cake was washed with deionized water until no Br<sup>-</sup> was detected by AgNO<sub>3</sub> solution. The solid was dried in vacuum at 70 °C for 12 h and grounded into powder which is labelled as Q-MMT.

### *Preparation of Cu-Q-MMT*

Ethanol (5 mL) and deionized water (10 mL) was added to the mixture of CuCl<sub>2</sub> (14.31 mg) and Q-MMT (0.2 g). The suspension was stirred at 50 °C for 12 h before cooled down to room temperature. Aqueous solution of NaBH<sub>4</sub> (5 mL, n (NaBH<sub>4</sub>): n (Cu) = 10: 1) was slowly added to the suspension within 2 h. The reaction mixture was filtered and the filter cake was washed with deionized water until no Cl<sup>-</sup> was detected by AgNO<sub>3</sub> solution. The solid was dried in vacuum at 60 °C for 12 h and grounded into powder to obtain Cu-Q-MMT.

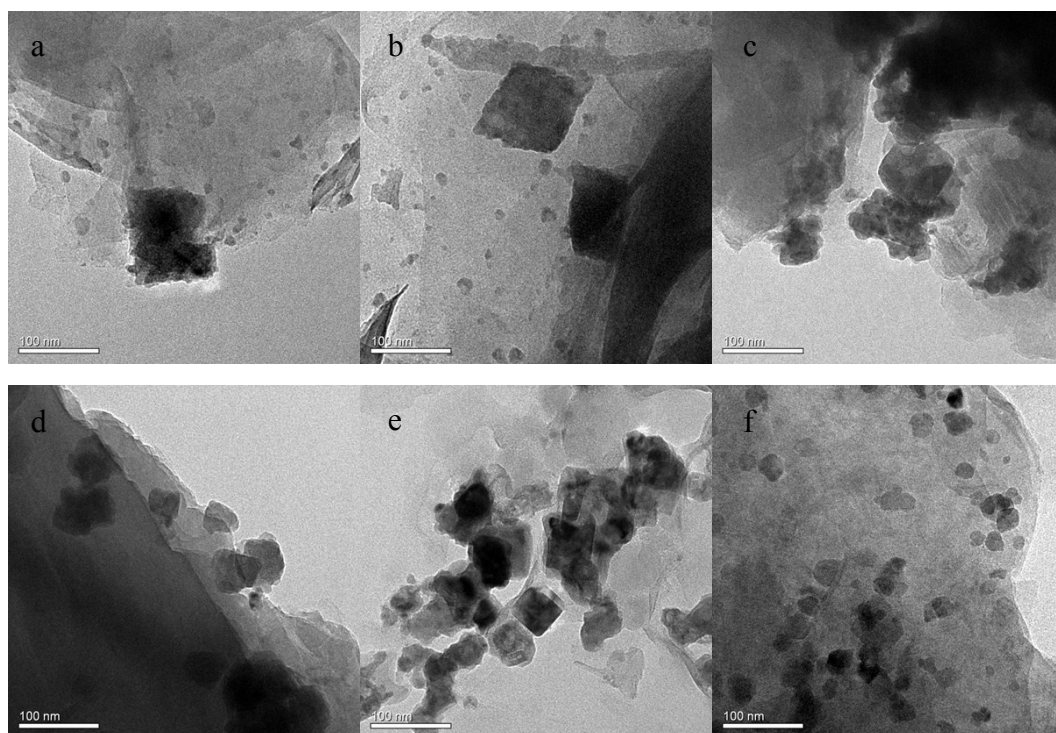

Figure 4. TEM micrographs of the different copper loadings of catalysts and recycled Cu-Q-MMT, Cu loading of catalysts a, b, c, d and e are 0.4 mmol, 1 mmol, 2 mmol, 3 mmol, 4 mmol per gram, respectively, in preparation and f is the recycled Cu-Q-MMT.

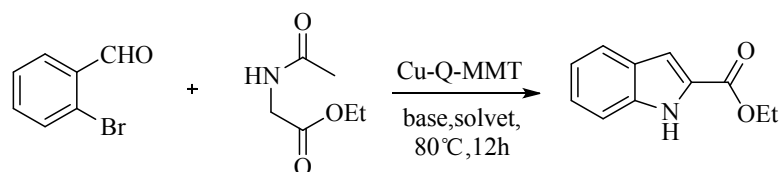

**Table 1.** Effect of base and solvent.

| Entry | Solvent       | Volume(mL) | Base                            | Equiv base | Yield (%) <sup>a</sup>  |
|-------|---------------|------------|---------------------------------|------------|-------------------------|
| 1     | DMSO          | 2          | Cs <sub>2</sub> CO <sub>3</sub> | 2          | 74.4, 85.2 <sup>b</sup> |
| 2     | DMSO          | 1.5        | Cs <sub>2</sub> CO <sub>3</sub> | 2          | 83.5 <sup>b</sup>       |
| 3     | DMSO          | 2.5        | Cs <sub>2</sub> CO <sub>3</sub> | 2          | 83.8 <sup>b</sup>       |
| 4     | DMSO          | 3          | Cs <sub>2</sub> CO <sub>3</sub> | 2          | 81.2 <sup>b</sup>       |
| 5     | DMSO          | 2          | Cs <sub>2</sub> CO <sub>3</sub> | 1          | 40.5                    |
| 6     | DMSO          | 2          | Cs <sub>2</sub> CO <sub>3</sub> | 3          | 73.8                    |
| 7     | DMSO          | 2          | K <sub>2</sub> CO <sub>3</sub>  | 2          | 44.2                    |
| 8     | DMSO          | 2          | NaOAc                           | 2          | 3.1                     |
| 9     | DMSO          | 2          | K <sub>2</sub> HPO <sub>4</sub> | 2          | 1                       |
| 10    | DMSO          | 2          | pyridine                        | 2          | 1                       |
| 11    | DMSO          | 2          | NaOH                            | 2          | 50                      |
| 12    | DMSO          | 2          | KOH                             | 2          | 34.6                    |
| 13    | DMSO          | 2          | TMG                             | 2          | 14.4                    |
| 14    | DMSO          | 2          | KHCO <sub>3</sub>               | 2          | 12.1                    |
| 15    | DMSO          | 2          | K <sub>3</sub> PO <sub>4</sub>  | 2          | 50                      |
| 16    | DMF           | 2          | Cs <sub>2</sub> CO <sub>3</sub> | 2          | 56.5                    |
| 17    | NMP           | 2          | Cs <sub>2</sub> CO <sub>3</sub> | 2          | 50                      |
| 18    | Toluene       | 2          | Cs <sub>2</sub> CO <sub>3</sub> | 2          | 32.5                    |
| 19    | Dioxane       | 2          | Cs <sub>2</sub> CO <sub>3</sub> | 2          | 33.3                    |
| 20    | 3- pentanone  | 2          | Cs <sub>2</sub> CO <sub>3</sub> | 2          | 67.6                    |
| 21    | Cyclohexanone | 2          | Cs <sub>2</sub> CO <sub>3</sub> | 2          | trace                   |
| 22    | 2-Me-THF      | 2          | Cs <sub>2</sub> CO <sub>3</sub> | 2          | 55                      |
| 23    | Ethanol       | 2          | Cs <sub>2</sub> CO <sub>3</sub> | 2          | 1                       |
| 24    | Acetonitrile  | 2          | Cs <sub>2</sub> CO <sub>3</sub> | 2          | 21.6                    |

<sup>a</sup> the amount of Cu-Q-MMT is 15 mg; <sup>b</sup>the amount of Cu-Q-MMT is 52.5 mg



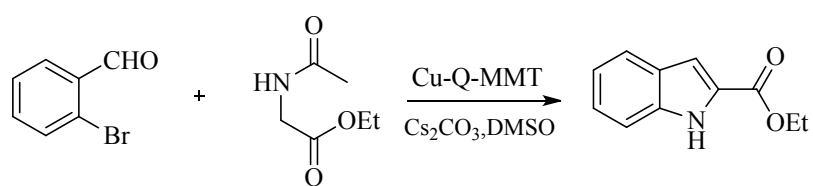

**Table 2.** Effect of reaction temperature and the amount of catalyst.

| Entry | Catalyst/mg | T/°C | Time(h) | Yield |
|-------|-------------|------|---------|-------|
| 1     | 15          | 80   | 8       | 71    |
| 2     | 15          | 80   | 12      | 74.4  |
| 3     | 15          | 80   | 16      | 74.1  |
| 4     | 15          | 80   | 20      | 76.2  |
| 5     | 15          | 80   | 24      | 75.3  |
| 6     | 15          | 70   | 12      | 2.4   |
| 7     | 15          | 90   | 12      | 73.9  |
| 8     | 15          | 100  | 12      | 75.2  |
| 9     | 30          | 80   | 12      | 79.9  |
| 10    | 45          | 80   | 12      | 83.3  |
| 11    | 52.5        | 80   | 12      | 85.2  |
| 12    | 60          | 80   | 12      | 83.2  |

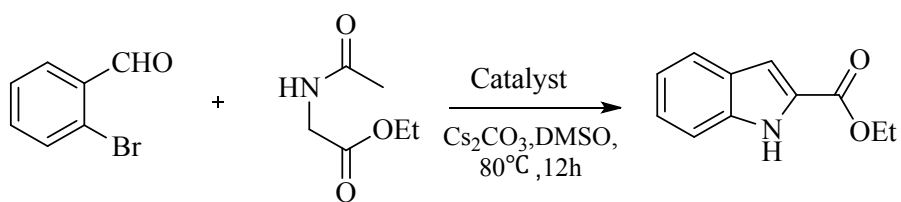

**Table 3.** Effect of different Cu loading of the catalyst

| Entry | Catalyst of different Cu loading <sup>a</sup> | Time/h | yield |
|-------|-----------------------------------------------|--------|-------|
| 1     | 1-Cu-Q-MMT                                    | 12     | 50.5  |
| 2     | 2.5-Cu-Q-MMT                                  | 12     | 63.4  |
| 3     | 5-Cu-Q-MMT                                    | 12     | 63.7  |
| 4     | Cu-Q-MMT                                      | 12     | 74.4  |
| 5     | 10-Cu-Q-MMT                                   | 12     | 62.1  |

<sup>a</sup>In the preparation of catalyst, the Cu loading of 1-Cu-Q-MMT, 2.5-Cu-Q-MMT, 5-Cu-Q-MMT, Cu-Q-MMT and 10-Cu-Q-MMT are 0.4 mmol, 1 mmol, 2 mmol, 3 mmol and 4 mmol per gram, respectively.

### Characterization data

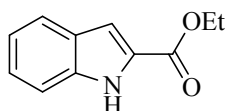

ethyl 1H-indole-2-carboxylate (white solid)

HRMS-ESI: calculated for  $[M+Na]^+ = 212.0688$ , found 212.0664

$^1H$  NMR (400 MHz, DMSO)  $\delta$  11.87 (s, 1H), 7.66 (d, 1H), 7.45 (d, 1H), 7.26 (t, 1H), 7.15 (s, 1H), 7.08 (t, 1H), 4.34 (q, 2H), 1.34 (t, 3H).

$^{13}C$  NMR (126 MHz, DMSO)  $\delta$  161.79, 137.83, 127.82, 127.19, 125.08, 122.52, 120.63, 113.04, 108.13, 60.89, 14.78.

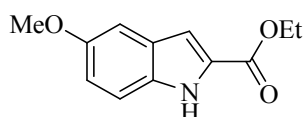

ethyl 5-methoxy-1H-indole-2-carboxylate (white solid)

HRMS-ESI: calculated for  $[M+Na]^+ = 242.0793$ , found 242.0788

$^1H$  NMR (400 MHz, DMSO)  $\delta$  7.82 (d, 1H), 7.58 (d, 1H), 7.46 (d, 1H), 6.96 (m, 3.0 Hz, 1H), 6.77 (d, 1H), 4.20 (q, 2H), 3.80 (s, 3H), 1.26 (t, 4H).

$^{13}C$  NMR (126 MHz, DMSO)  $\delta$  161.72, 154.41, 133.18, 127.99, 127.50, 116.69, 113.93, 107.72, 102.43, 60.78, 55.69, 14.80.

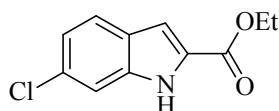

ethyl 6-chloro-1H-indole-2-carboxylate (white solid)

HRMS-ESI: calculated for  $[M+Na]^+ = 246.0298$ , found 246.0287

$^1H$  NMR (400 MHz, DMSO)  $\delta$  12.01 (s, 1H), 7.67 (d, 1H), 7.44 (s, 1H), 7.16 (d, 1H), 7.09 (m, 1.7 Hz, 1H), 4.33 (q, 2H), 1.32 (t, 3H).

$^{13}C$  NMR (126 MHz, DMSO)  $\delta$  161.50, 138.03, 129.70, 128.85, 125.97, 124.18, 121.25, 112.40, 108.28, 61.11, 14.75.

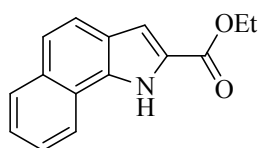

ethyl 1H-benzo[g]indole-2-carboxylate (yellow solid)

HRMS-ESI: calculated for  $[M+Na]^+ = 262.0844$ , found 262.0825

$^1H$  NMR (400 MHz, DMSO)  $\delta$  12.74 (s, 1H), 8.75 (d, 1H), 7.92 (d, 1H), 7.68 (d, 1H), 7.53 (m, 6.4 Hz, 4H), 7.28 (d, 1H), 4.36 (q, 2H), 1.36 (t, 3H).

$^{13}C$  NMR (126 MHz, DMSO)  $\delta$  161.67, 133.60, 131.85, 128.87, 126.49, 126.31, 125.84, 123.57, 122.66, 122.62, 121.93, 121.65, 110.11, 60.78, 14.87.

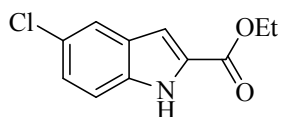

ethyl 5-chloro-1H-indole-2-carboxylate (white solid)

HRMS-ESI: calculated for  $[M+Na]^+ = 246.0298$ , found 246.0275

$^1H$  NMR (400 MHz, DMSO)  $\delta$  12.08 (s, 1H), 7.72 (d, 1H), 7.45 (d, 1H), 7.25 (m, 1H), 7.11 (d, 1H), 4.33 (q, 2H), 1.33 (t, 3H).

$^{13}C$  NMR (126 MHz, DMSO)  $\delta$  161.48, 136.19, 129.28, 128.18, 125.23, 125.13, 121.56, 114.72, 107.65, 61.14, 14.73.

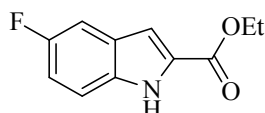

ethyl 5-fluoro-1H-indole-2-carboxylate (white solid)

HRMS-ESI: calculated for  $[M+Na]^+ = 230.0593$ , found 230.0598

$^1H$  NMR (400 MHz, DMSO)  $\delta$  11.99 (s, 1H), 7.48 – 7.37 (m, 2H), 7.12 (s, 2H), 4.33 (q, 2H), 1.33 (t, 3H).

$^{13}C$  NMR (126 MHz, DMSO)  $\delta$  161.52, 158.63, 156.78, 134.57, 129.47, 127.26, 127.18, 114.42, 114.34, 114.14, 113.93, 108.07, 108.03, 106.61, 106.42, 61.05, 14.74.

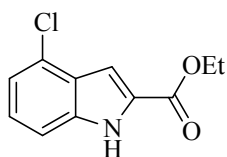

ethyl 4-chloro-1H-indole-2-carboxylate (white solid)

HRMS-ESI: calculated for  $[M+Na]^+ = 246.0298$ , found 246.0307

$^1H$  NMR (400 MHz, DMSO)  $\delta$  12.29 (s, 1H), 7.44 (d, 1H), 7.31 – 7.23 (m, 1H), 7.18 (d, 1H), 7.11 (d, 1H), 4.37 (q, 2H), 1.36 (t, 3H).

$^{13}C$  NMR (101 MHz, DMSO)  $\delta$  161.32, 138.40, 128.73, 126.31, 125.87, 125.85, 120.23, 112.29, 105.64, 61.24, 14.69.

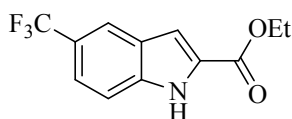

ethyl 5-(trifluoromethyl)-1H-indole-2-carboxylate (white solid)

HRMS-ESI: calculated for  $[M+Na]^+ = 280.0561$ , found 280.0563

$^1H$  NMR (400 MHz, DMSO)  $\delta$  12.34 (s, 1H), 8.15 (s, 1H), 7.64 (d, 1H), 7.55 (d, 1H), 7.32 (s, 1H), 4.38 (q, 2H), 1.36 (t, 3H).

$^{13}C$  NMR (101 MHz, DMSO)  $\delta$  161.39, 139.03, 129.94, 127.03, 126.42, 124.34, 121.62, 121.31, 121.13, 121.10, 120.59, 120.55, 114.03, 109.10, 61.28, 14.70.

# <sup>1</sup>H NMR of products

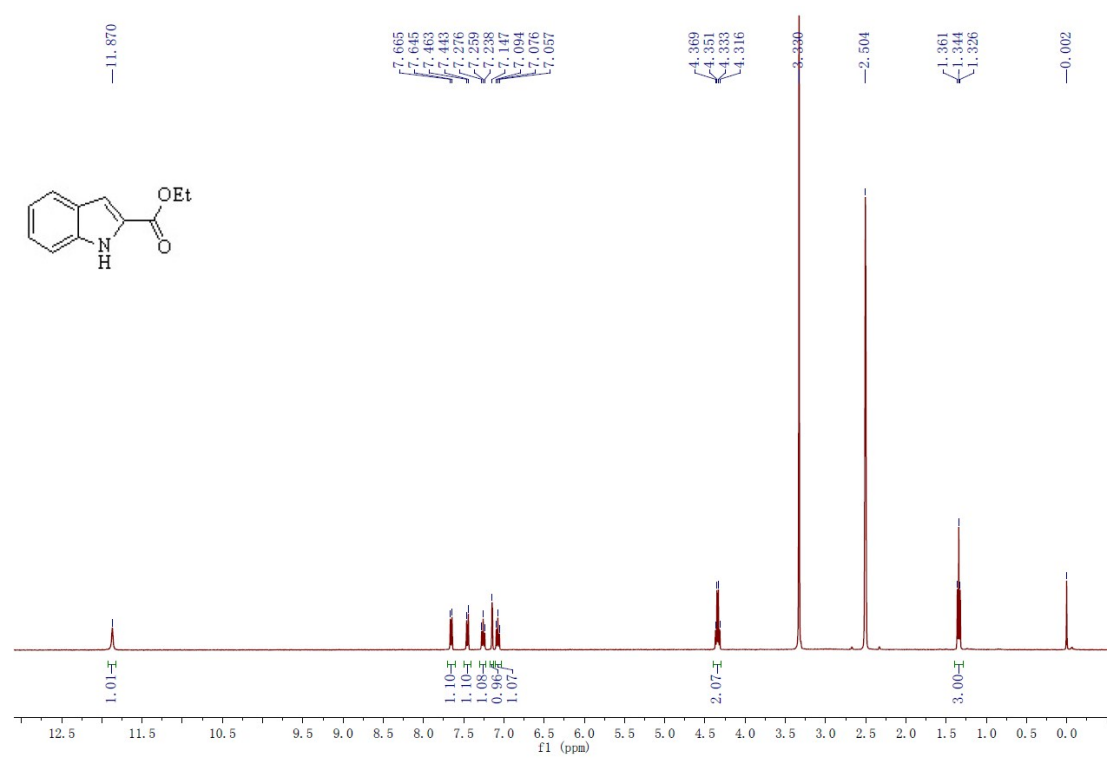

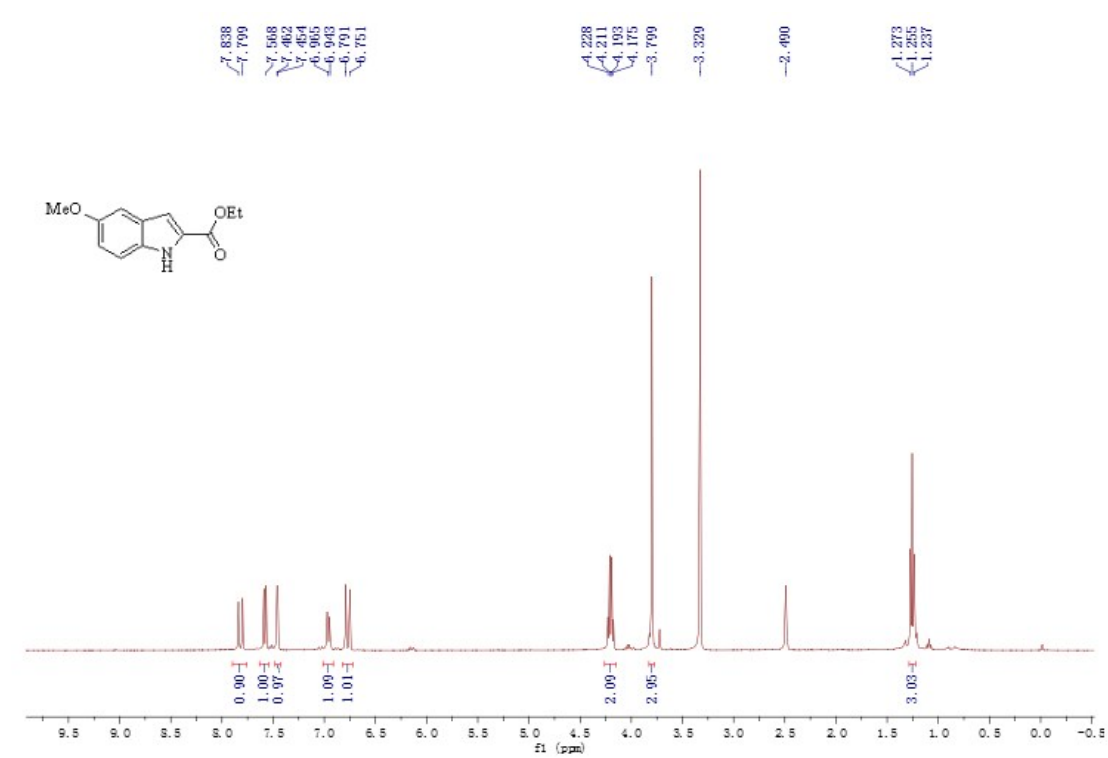

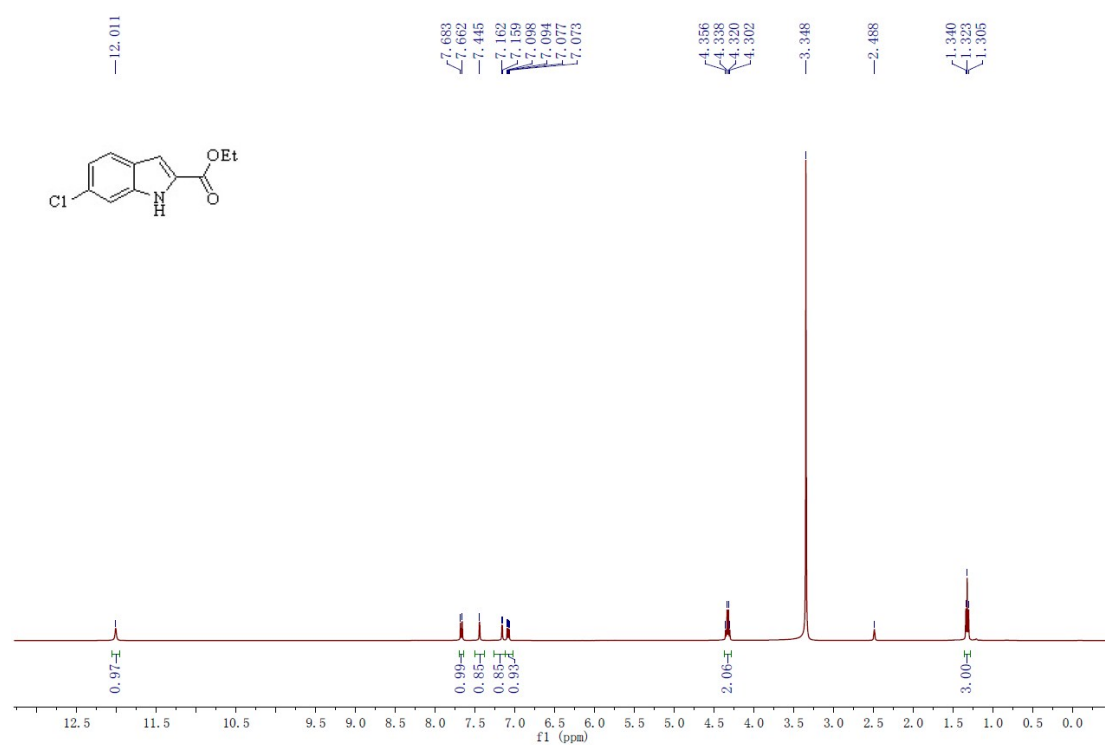

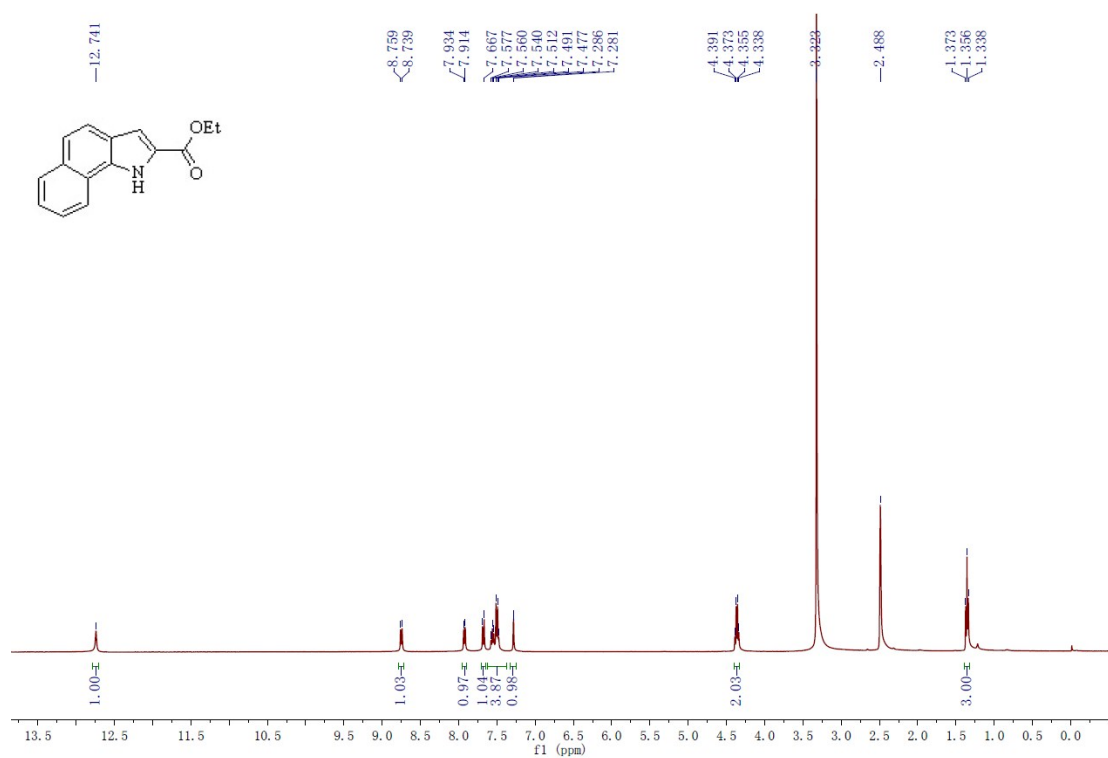



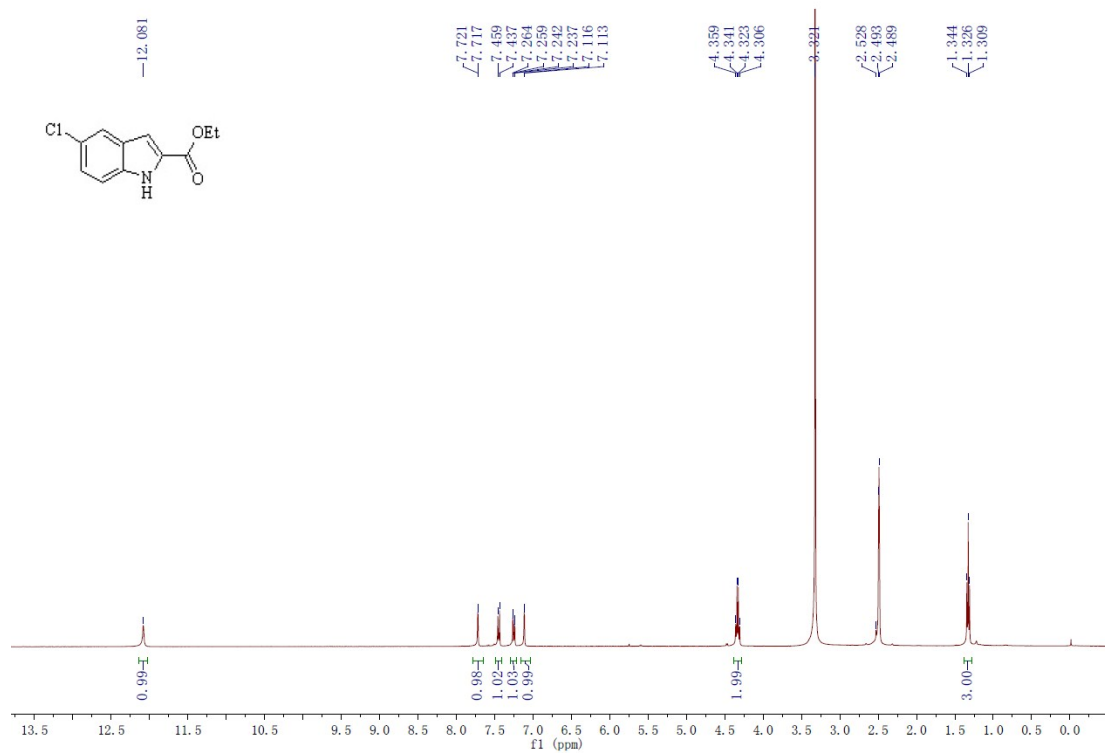

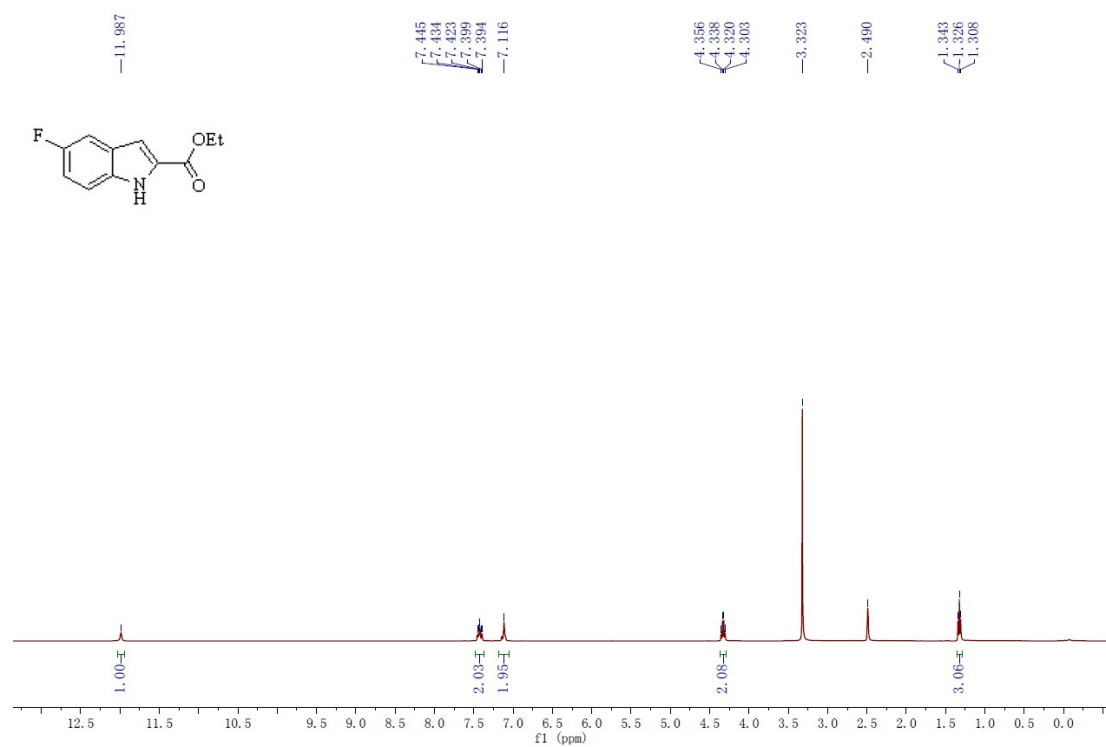

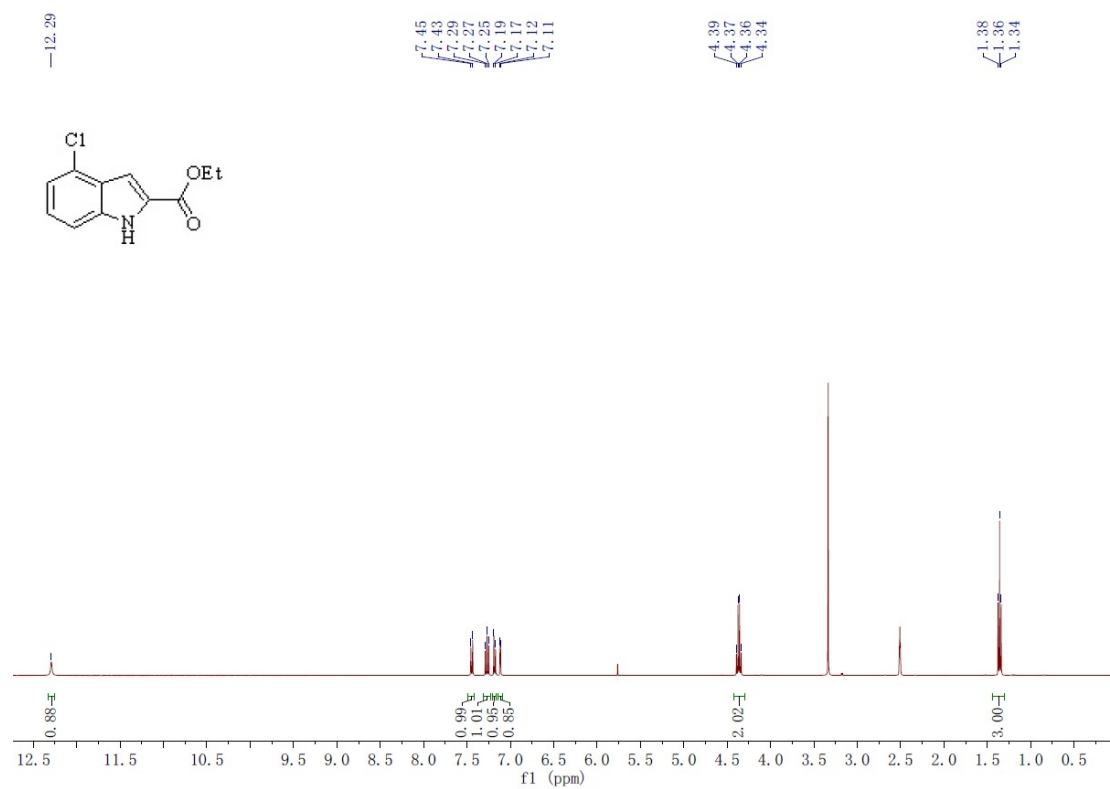

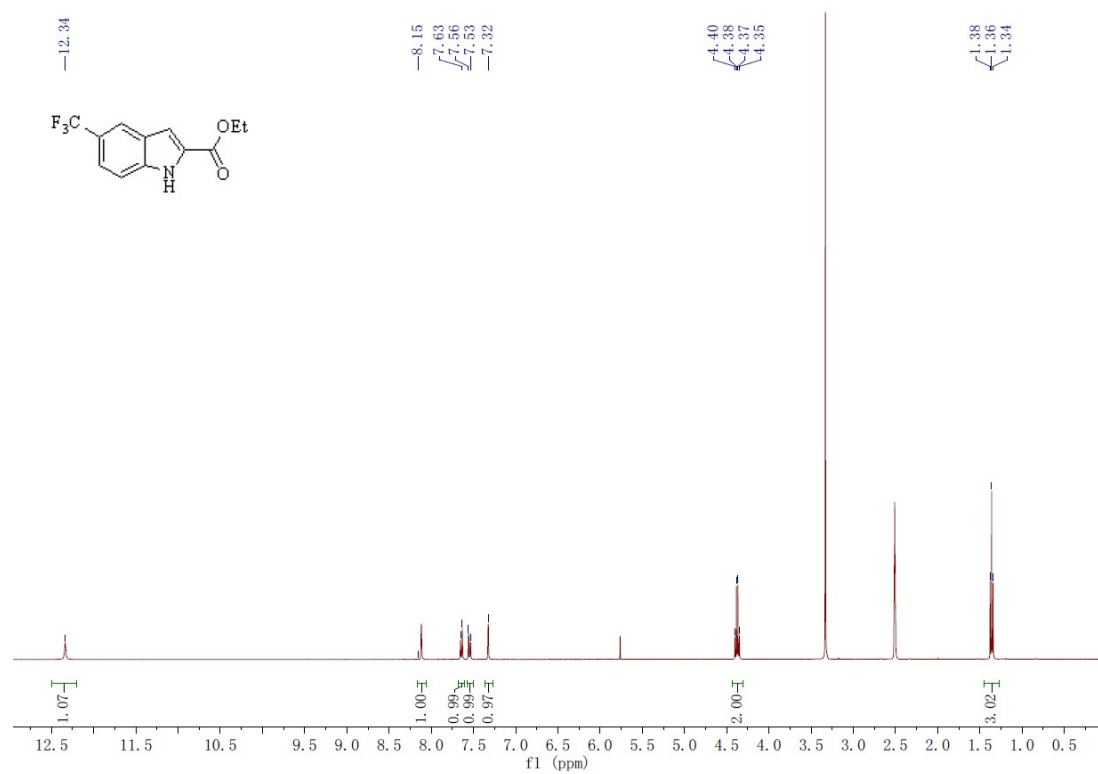

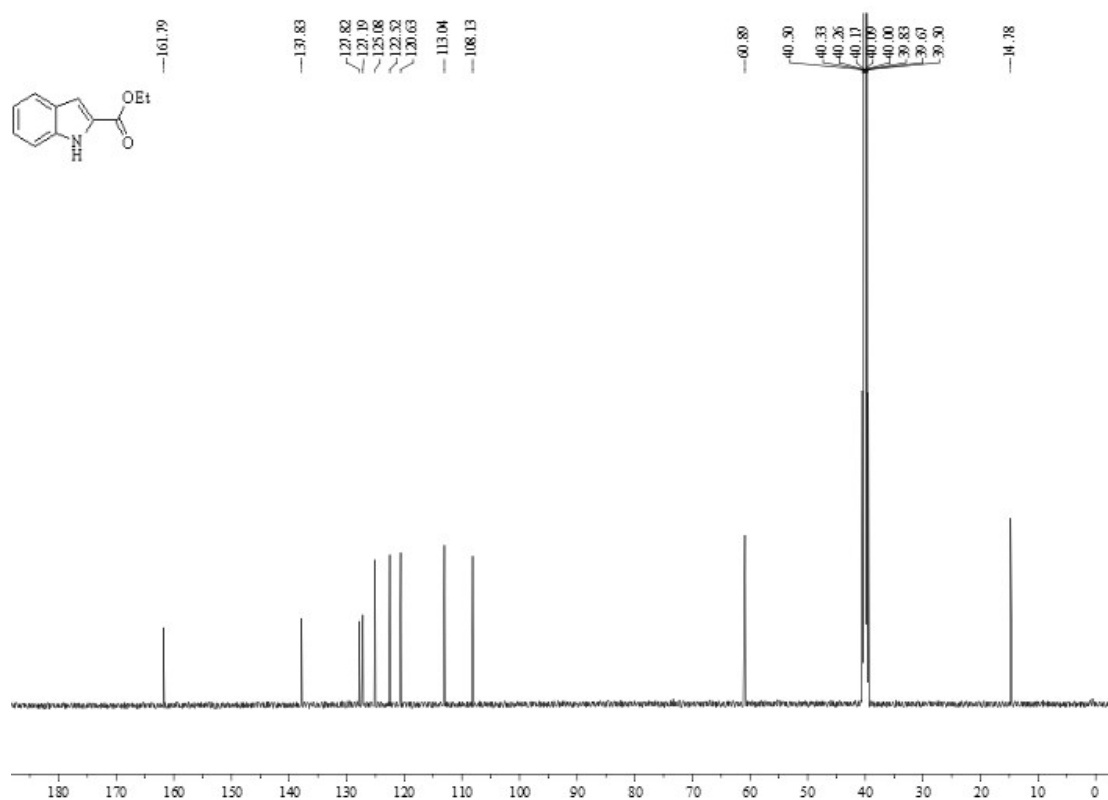

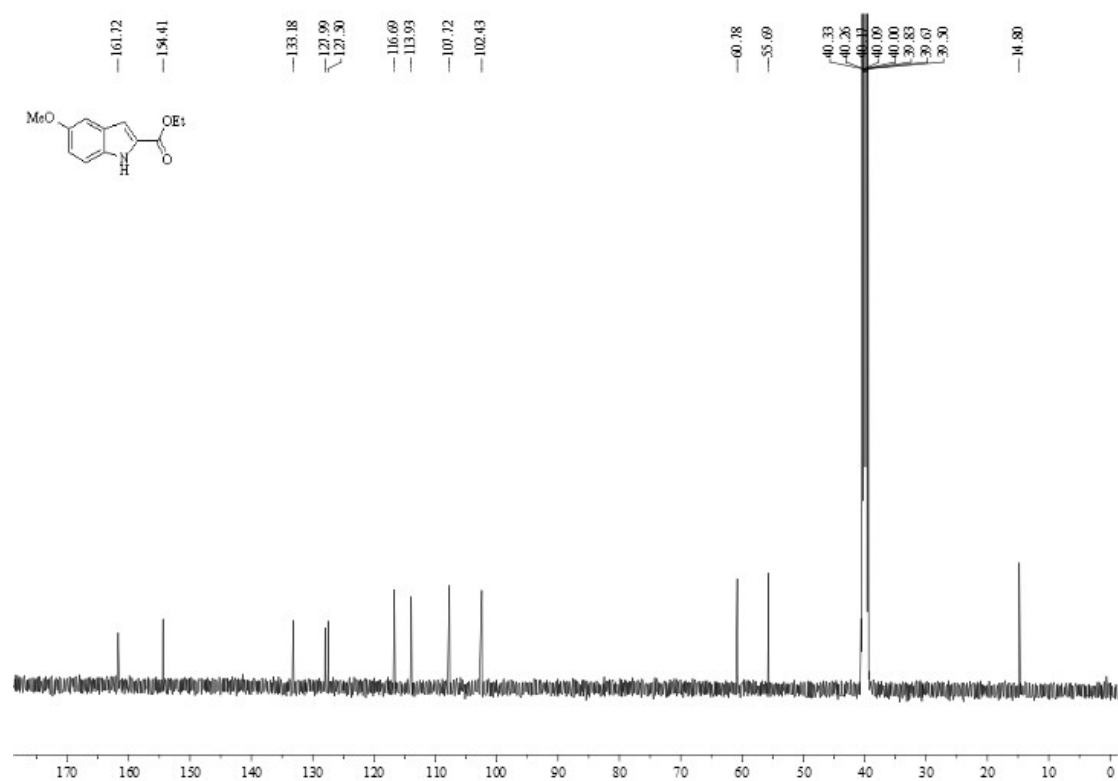

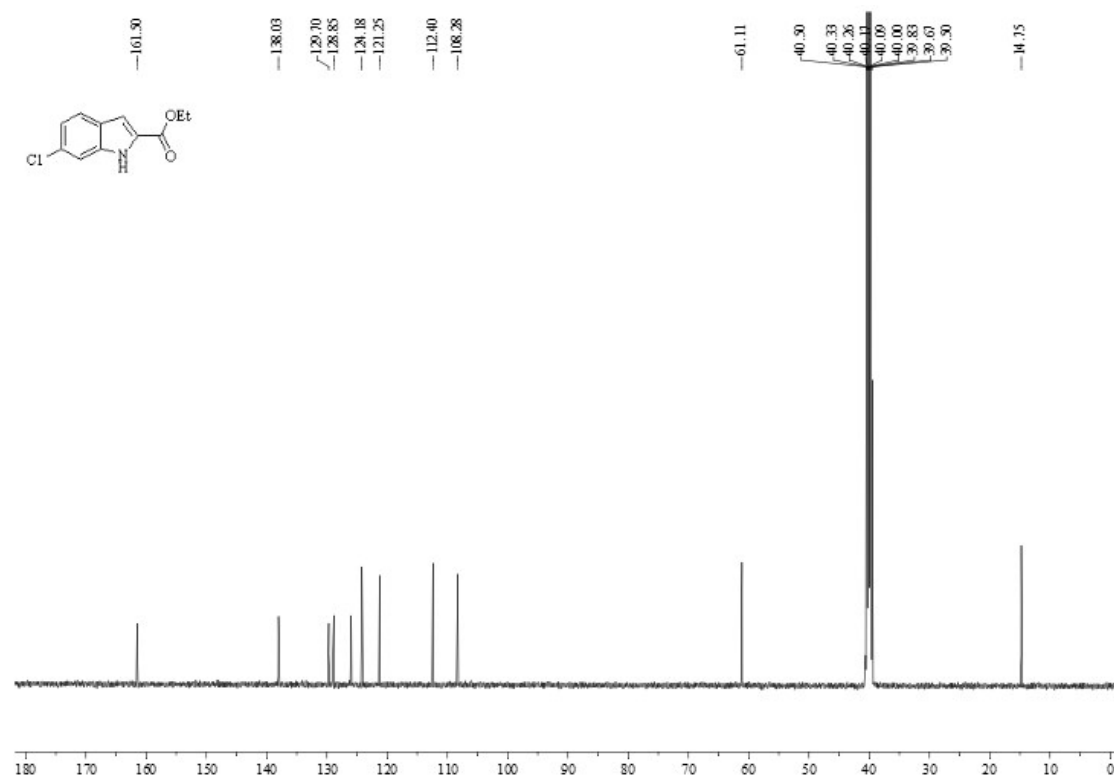

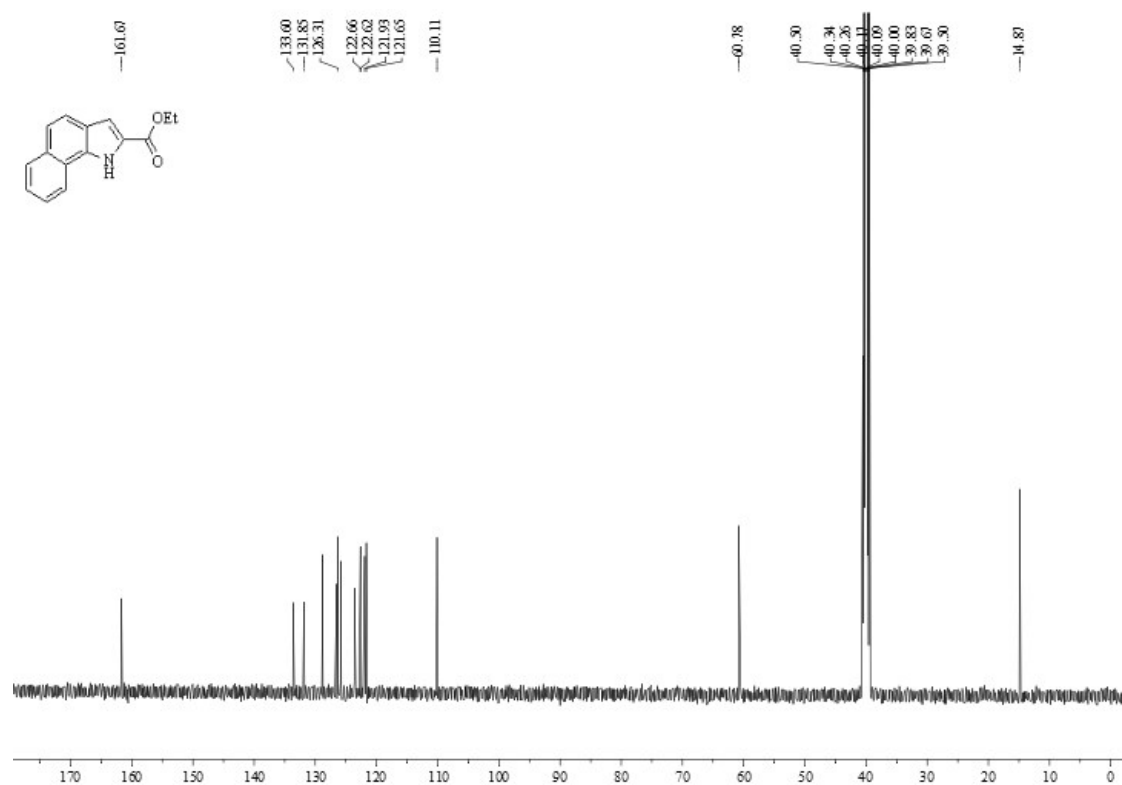



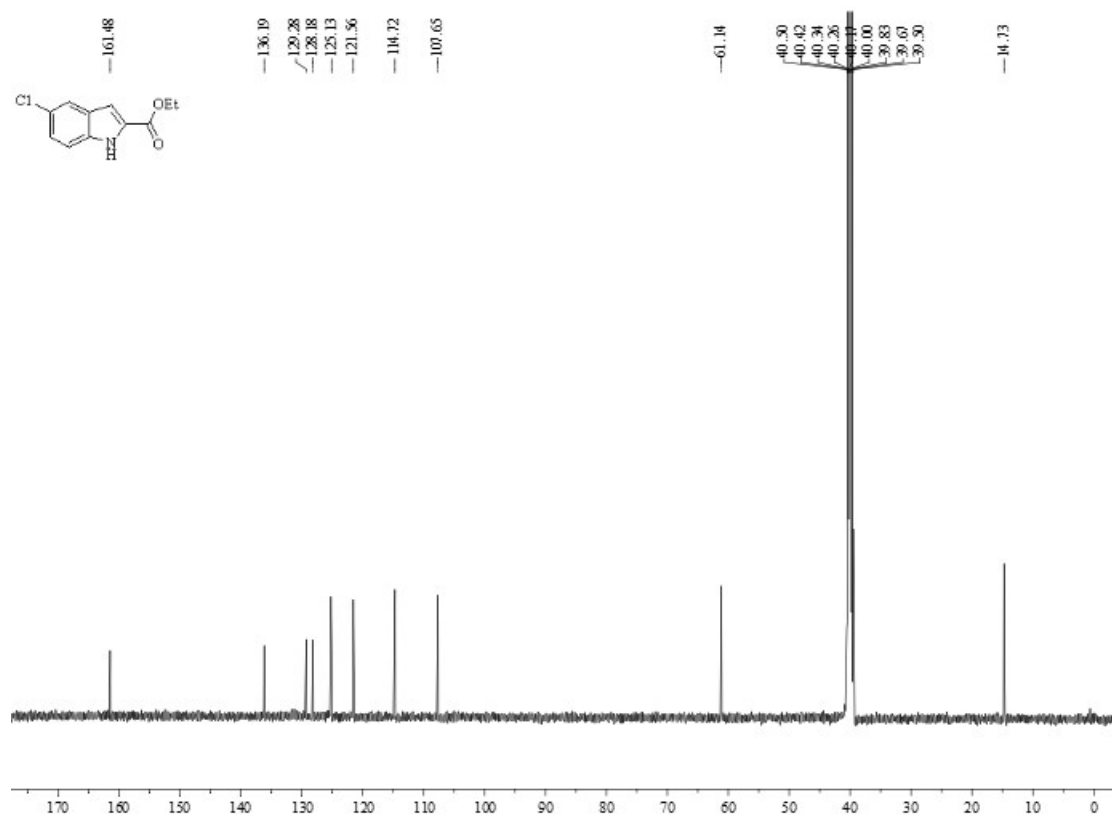

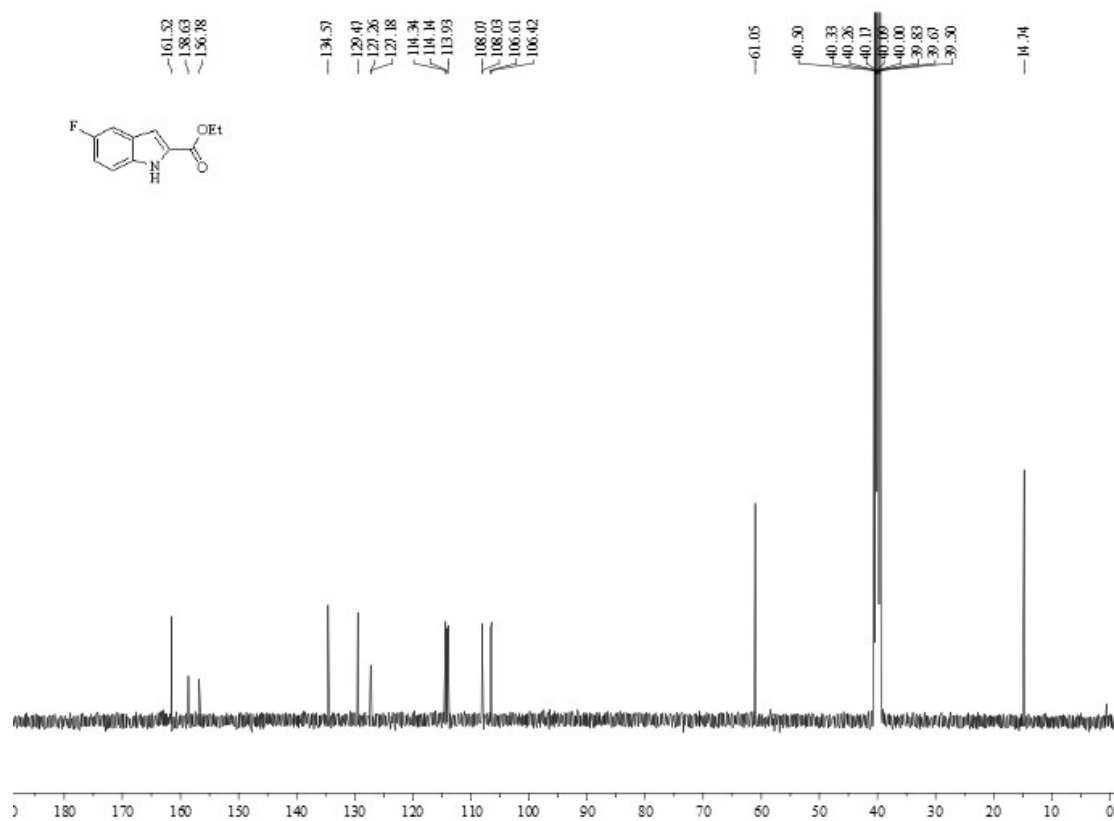

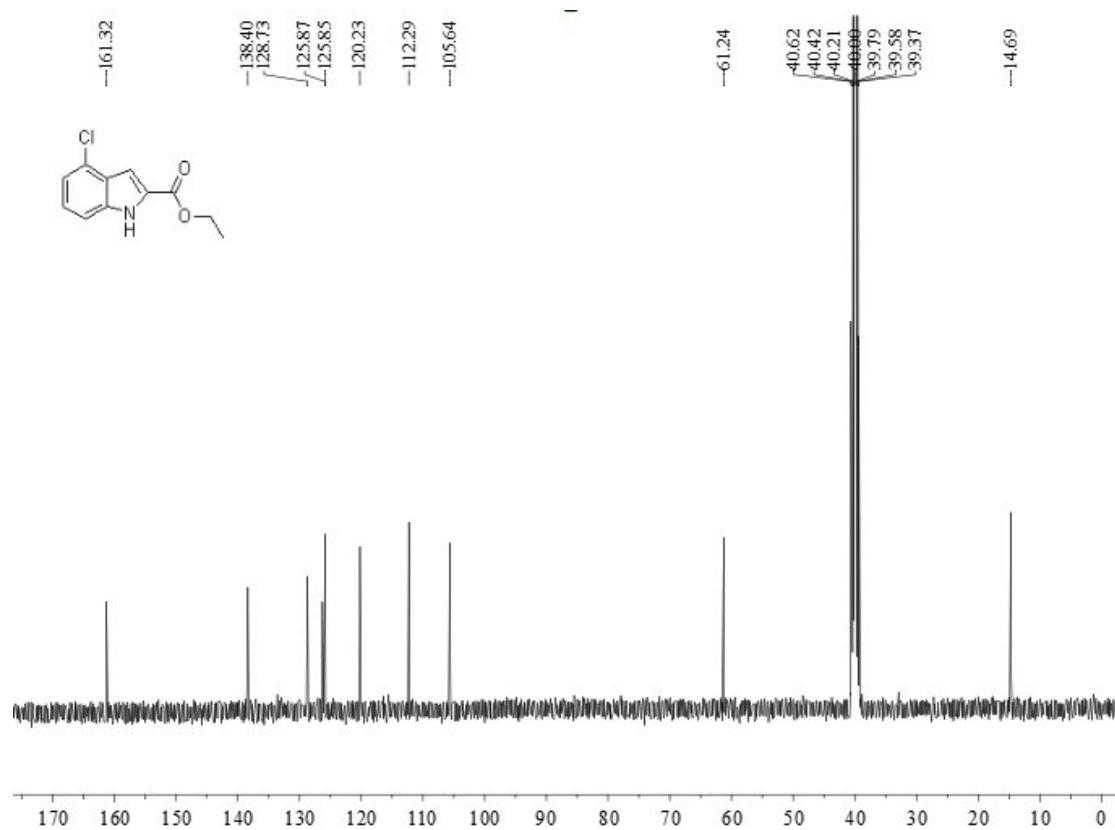

Supplement: c6ra25861a1.pdf [file c6ra25861a1.pdf]
